# Supplementary material for: Sinapic Acid Protects SH-SY5Y Human Neuroblastoma Cells against 6-Hydroxydopamine-Induced Neurotoxicity
Source: MDPI journal article supplement (doi:10.3390/biomedicines9030295), 2021-03-13
Supplement: s1 [file s1]

# Sinapic Acid Protects SH-sy5y Human Neuroblastoma Cells against 6-Hydroxydopamine-Induced Neurotoxicity

Tsendsuren Tungalag and Dong Kwon Yang \*

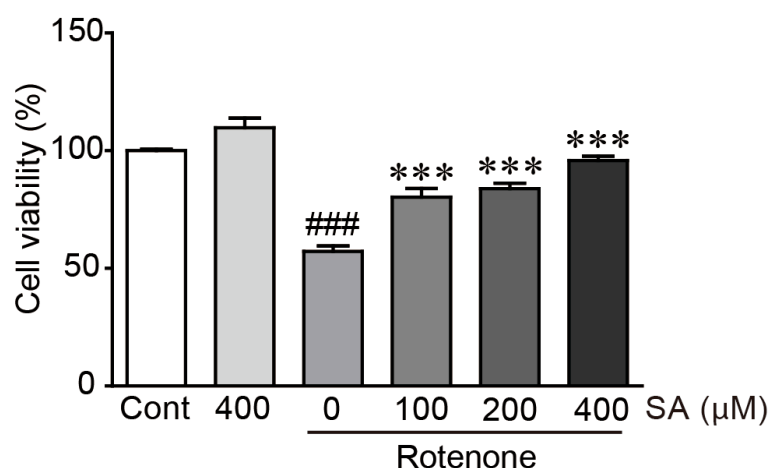

**Figure S1.** SA rescues SH-SY5Y neuroblastoma cells from rotenone-induced neurotoxicity. The cell viability was measured via the MTT assay using cells treated with rotenone for 24 h with or without 100, 200, or 400  $\mu$ M SA pretreatment for 24 h. The columns and error bars represent the mean  $\pm$  standard error of the mean (SEM) from three independent experiments. Significance was determined via a one-way ANOVA coupled with Bonferroni's post hoc test. ### $P$  < 0.001 vs. control group. \*\*\* $P$  < 0.001 vs. rotenone-only group. Cont, control; SA, sinapic acid.

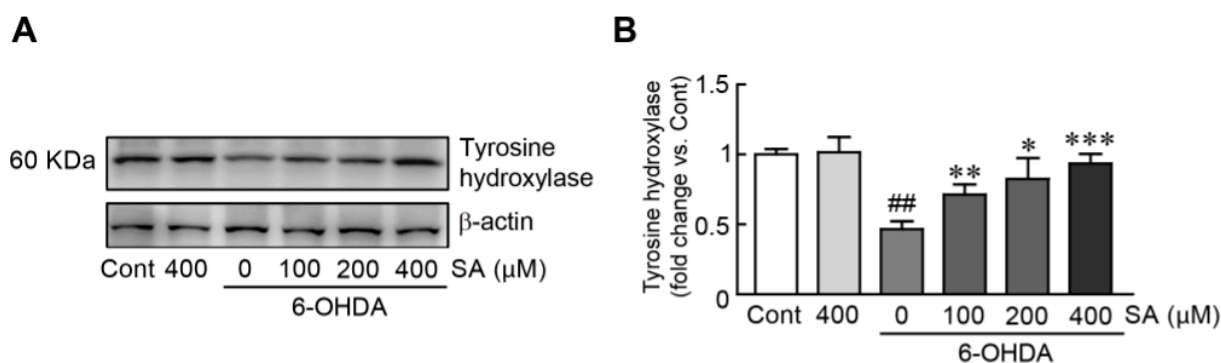

**Figure S2.** SA preserves the expression level of tyrosine hydroxylase protein caused by 6-OHDA-induced neurotoxicity in SH-SY5Y neuroblastoma cells. (A) Western blot analyses were performed to measure the expression level of tyrosine hydroxylase protein in SA-pretreated/6-OHDA-treated cells. (B) The expression level of tyrosine hydroxylase protein was quantified using HD imaging software.  $\beta$ -actin was used as the loading control. Western blot analysis was performed in triplicate with three independent samples. Data are shown as the mean  $\pm$  standard error of the mean (SEM). Significance was determined via a one-way ANOVA with a Bonferroni post hoc test. # $P$  < 0.01 vs. control group. \* $P$  < 0.05, \*\* $P$  < 0.01, and \*\*\* $P$  < 0.001 vs. the 6-OHDA-only-treated group. Cont, control; SA, sinapic acid; 6-OHDA, 6-hydroxydopamine.
